# Supplementary material for: Aquaporin-8 ameliorates hepatic steatosis through farnesoid X receptor in obese mice
Source: PubMed Central journal article supplement — iScience. 2023 Apr 1;26(4):106561. doi: 10.1016/j.isci.2023.106561 (PMC10130924; doi:10.1016/j.isci.2023.106561), 2023-04-01
Supplement: mmc1.pdf [file mmc1.pdf]

iScience, Volume 26

## **Supplemental information**

### **Aquaporin-8 ameliorates hepatic steatosis through farnesoid X receptor in obese mice**

**Minqi Xiang, Xu Qian, Luyu Han, Hui Wang, Jiqui Wang, Weiren Liu, Yanyun Gu, Shuangshuang Yao, Jian Yang, Yifei Zhang, Ying Peng, and Zhiguo Zhang**

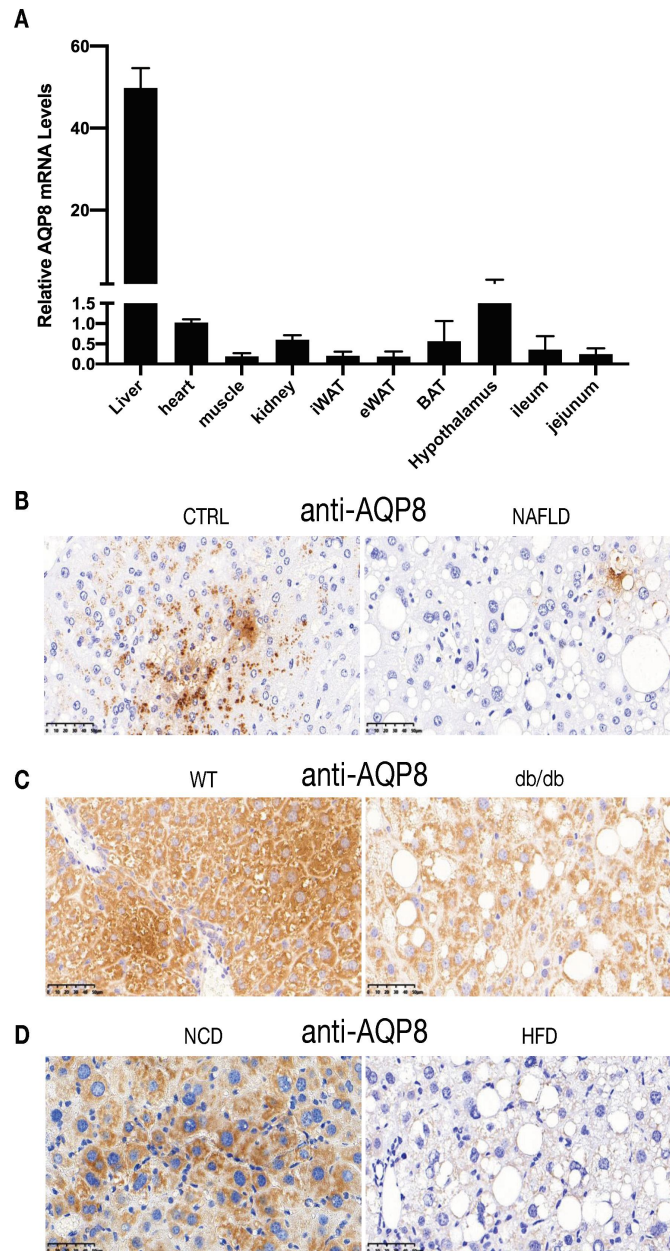

**Figure S1. AQP8 is highly expressed in the liver and its expression is downregulated in the states of hepatic steatosis, related to Figure 1.**

A, Normal wild type mice was sacrificed and mouse tissue distribution of AQP8 mRNA determined by RT-PCR. The results were expressed as relative expression levels after standardization by 36B4. The AQP8 mRNA levels were normalized as the average of heart mRNA levels =1. iWAT, inguinal white adipose tissue; eWAT, epididymal white adipose tissue; BAT, brown adipose tissue. n=6-8. The data represent the mean $\pm$ SEM values. AQP8 expression was decreased in the livers of NAFLD patients and obese mice. AQP8 immunohistochemistry in the livers of NAFLD patients(B), db/db mice(C), HFD mice(D). magnification: 400 $\times$ , scale bar, 50  $\mu$ m.

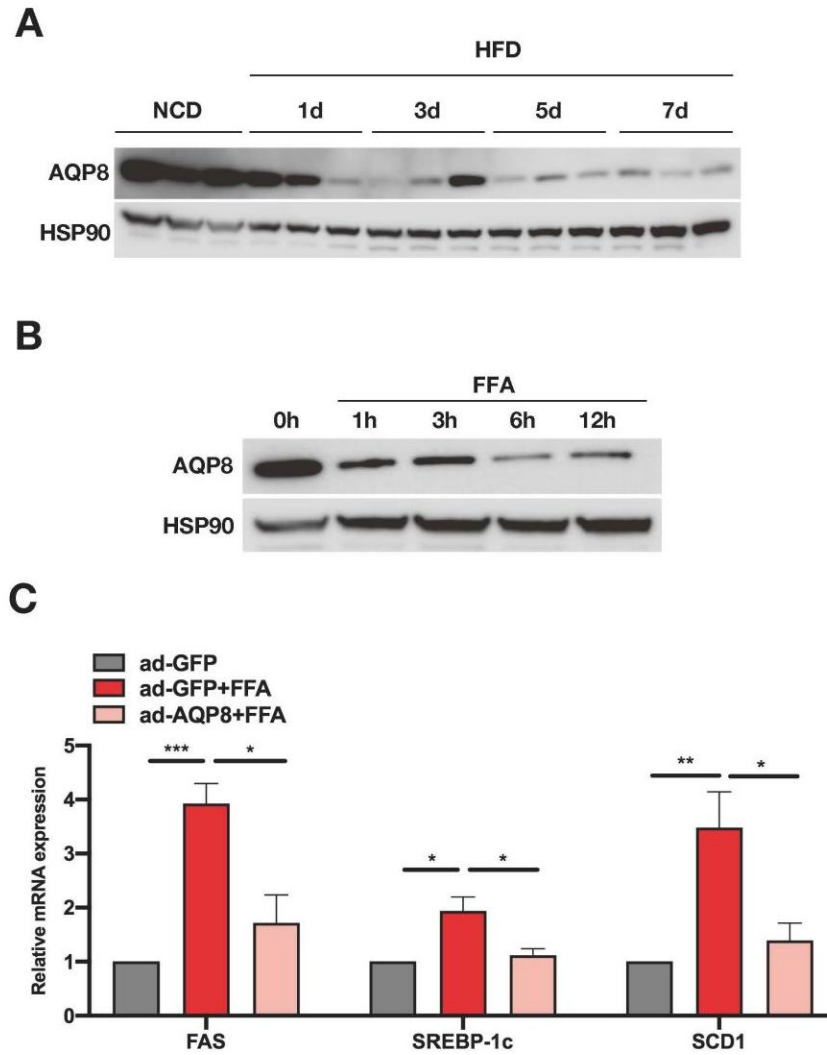

**Figure S2. Downregulation of AQP8 in the livers of obese mice and in vitro NAFLD model, related to Figure 1.**

A, short-term HFD mice (n=5 per group), B, HepG2 cells without or with FFA (OA:PA=2:1) treatment for the indicated time. C, Primary mouse hepatocytes (PMH) infected with either ad-GFP or ad-AQP8 with or without FFA treatment. qPCR analysis of lipogenic genes. The data represent the mean±SEM values. \*p<0.05 \*\*p<0.01 \*\*\*p<0.001

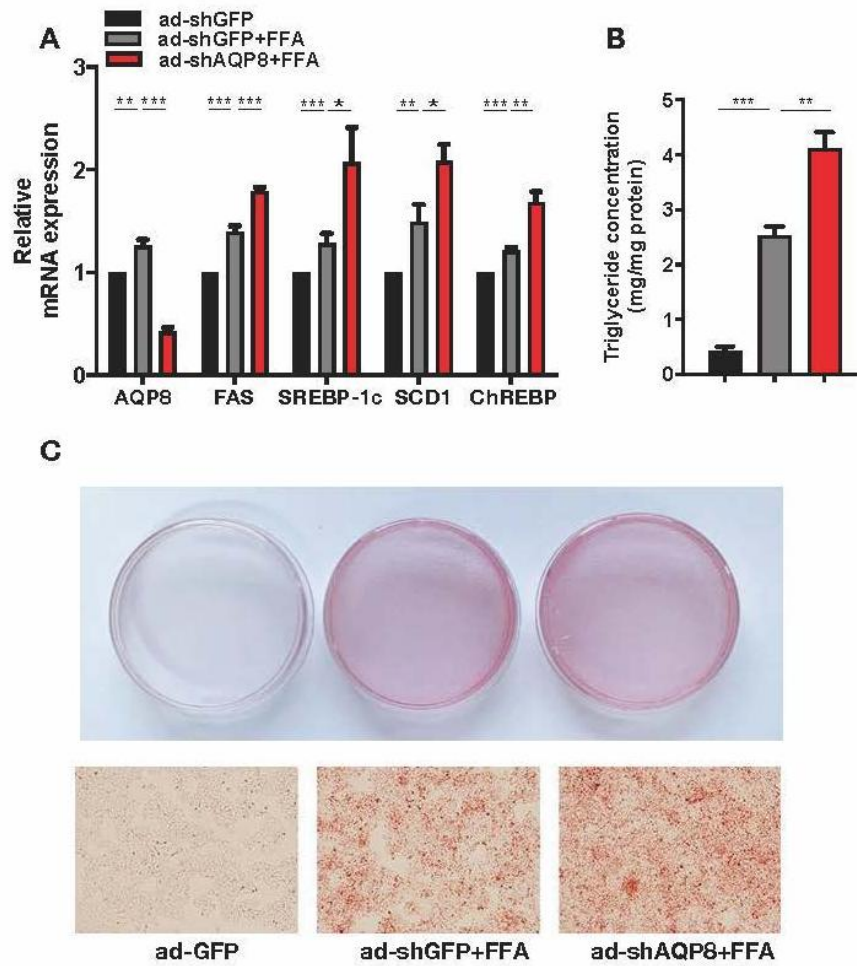

**Figure S3. Knockdown of AQP8 in hepatocytes exacerbates TG accumulation and promotes hepatic lipid synthesis, related to Figure 1.**

PMH and HepG2 cells were transfected with either ad-GFP or ad-shAQP8 with or without FFA treatment. A, qPCR analysis of PMH on mRNA expression related to AQP8 and lipogenesis. B, Quantification of TG contents of PMH. C, oil red O staining (200 X) of HepG2 cells. The data represent the mean $\pm$ SEM values and three independent experiments in triplicate. \* $p$ <0.05 \*\* $p$ <0.01 \*\*\* $p$ <0.001

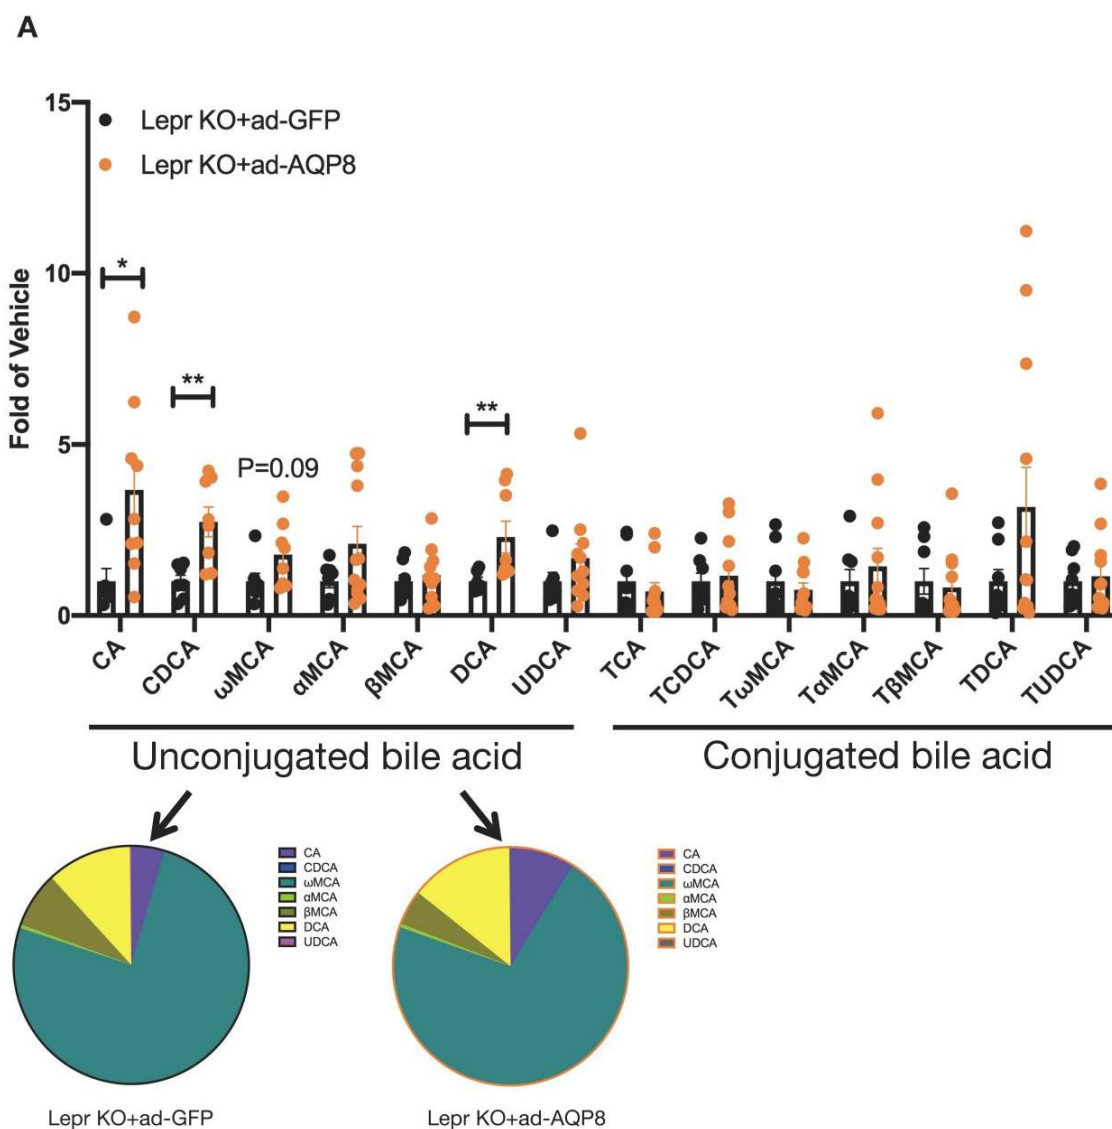

**Figure S4. Hepatic overexpression of AQP8 in the livers of db/db mice alters serum bile acid composition, related to Figure 2.**

A. Serum bile acids were measured by ultra-high performance liquid chromatography–tandem mass spectrometry (CA, cholic acid; CDCA, chenodeoxycholic acid; MCA, muricholic acid; DCA, deoxycholic acid; UDCA, ursodeoxycholic acid; TCA, taurocholic acid; TCDCA, taurochenodeoxycholic acid; TMCA, tauromuricholic acid; TDCA, taurodeoxycholic acid; TUDCA, tauroursodeoxycholic acid). Data are presented as the mean  $\pm$  SEM. n = 8–12 mice per group.

**A** -1500

```

gctggccaacatggtgaaatcccgctctactaaaaatacaaaatttagctggcggtgggcacatgacctg
agtccagctacttggaggctgaggcaggagaatctctgaaacccgggagcagaagtgcagtgagctg
agatggcaccactgtactccaTACTCCAGcctgggcaacagagcgcgactctgtctccagaaaaaa
aaagtcaactattgggtattgtatgtatcctccttaattattaaaaaactcttagtggaacttaaaag
cttctaaaaagtagactaagaaaatccaactgtatgctgtcagtcagagatgacctctgtgactttccctcc
cctctatttcaaatagtgtttgttttataataagagttgaattttatattatgcaacttgattcaagtgtttc
aatttaagtataacattagcatttccocctggcaattaaaaatgctcaatgagcataaattgtaaggcttataat
attgattatgcaactggctgaattaatttccatattttggaaatgtaggtattgtaatactttaagtgactc
tagttctcaaaaagacaataattgagcatttaattgaggaatttacttgtccccactgaccctgactgct
ttgggacatcagctgtctgtgtgtgtggaagatccgtatcgccttgcctcaaaagtcaagcacaataaagggtg
gattttggcgttaactgcagacagtcataaactgtataatgtttcttaactttttaaaccaccataaacac
agcttaccacaacctttgttccctgcgaacctcattttagtagcagggggcgggtcagcagtggtcagcag
tgtgctgtgcccctgagccggctcctctaggggcctctgctcctggccaccagagctccta
atggtgtctgtgtctccccagggctgaaggagataacttataatctgtcgaaggcttagccgagcca
gaagccgaagccactgcccctcctggaggagacactgcaagctcctgagcgggtggcgggctgtcgcg
aggtctcatcccaactccttgagaagccttggctcactacagtggtgcacatgttctctcctgttctgtgac
atgctgttttaataaatactcactgccaccagtgcctgtggtggacctgctggctgccgtcctgttcc
gtgcccactggctggcggccagggtcactctgtgttagctaaagccaggaccacaagtctgtttga
ccttggctactccctgtgagtcacaccggccatgaccttgagtcatttaggatctactcctcactcctgctg
tttgtgagcagatgacattgctcactcctgacccctgtcctccaccagatgtgaggtAGTGCTCTT
CTCGGGCTCCTGTCTCCGCCCTGGCCACTGGCCTGCTCAGTTGCCTCCTTC
ATCTTGGTCATGGTGGCAGGCTGAAGAATGGCCCTAAA +150

```

**B** -1500

```

Gctggccaacatggtgaaatcccgctctactaaaaatacaaaatttagctggcggtgggcacatgacctg
gtccagctacttggaggctgaggcaggagaatctctgaaacccgggagcagaagtgcagtgagctgaga
tggcaaccactgtactccaTACTCCAGcctgggcaacagagcgcgactctgtctccagaaaaaaaggt
caactattgggtattgtatgtatcctccttaattattaaaaaactcttagtggaacttaaaagctctaa
aaagtatgactaagaaaatccacctgtatgctgtcagtcagagcCATACTctgtgactttccctccctctat
tcaaatagtgtttgttttataataagagttgaattttatattatgcaacttgattcaagtgtttcaatttaattgtt
atacattagcatttccocctggcaattaaaaatgctcaatgagcataaattgtaaggcttataatgttattatgca
ctatggctgaattaatattccatattttggaaatgtagtatactttaaagtgactgatttccaca
aggaaacaataattgagcattttaaattgaggaatttacttctccccCATACTcgtgactgcttgggacatcag
fgctgtctgtgtgtggaagatccgtatcgccttgcctcaaaagtcaagcacaataaagggtagattttggcgttaac
tgacagcagtcataaactgttataatgttttcttaacttttaaaaccaccataaaacagcttaccacaacctttt
gttccctgcgaaaacctcattttagtagcagggggcgggtcagcagtggtgctgctggtgcccctgag
gcccAAAcgggggtcctctaggggcctctgctcctggccaccagagctcctaattgtgtctgtgtctctcc
cctcagggctgaaggagataacttataatctgtcgaaggcttagccgagccagaagcgaagccactgcccct
cctggaggagacctgcaagctcctgagcgggtggcgggctcctcagcaggtctcatcccaactcttgaga
agccttAAAcacagtggtgcacatgttctctcctgttctgttgacatgtcgttttaataaatactcacttg
ccaccagtcctgtgttggacctctgctgctgcccgtcctgttccgtgcccactggctggcgggcccagg
gttcacctctgtgttagctaaagcccAAAcacagctccttgaactggcttactcctgtgagtcacaaccog
gcccAAAcctgagtcattttaggatctactcctcactcactgctgtttgtgagcagcagatgctgctcactc
cctgaccctgtctccaccagatgtgaggtAGTGCTCTTCGGGCTCCTGTCCGCCCTG
GCCACTGGCCTGCTCAGTTGCCTCCTTCATCTTAAATGGTGGCAGGCTGAAG
GAATGGCCCTAAA +150

```

**Figure S5. FXR Element(FXRE) sites and FXRE mutation in the human AQP8 promoter, related to Figure 6.**

A, Putative FXRE motifs(marked Yellow)(<https://jaspar.genereg.net/matrix/MA1110.1/>) in nucleotide sequence of the human AQP8 gene promoter from nt-1500 to 150, which was cloned into pGL4.14-luciferase reporter plasmid. B, Mutation(site-directed mutagenesis) of FXRE motifs(marked Red) within the construct pGL4.14-AQP8.
